# Supplementary material for: The role of glutamate oxaloacetate transaminases in sulfite biosynthesis and H2S metabolism
Source: PubMed Central journal article supplement (PMC7711302; doi:10.1016/j.redox.2020.101800), 2020-11-24
Supplement: mmc1.pdf [file mmc1.pdf]

# Supplementary figures

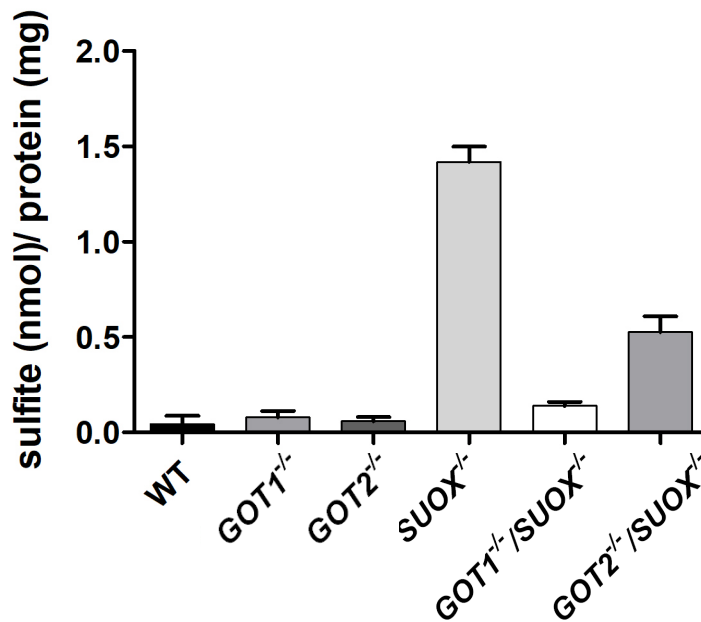

**Fig. S1: Sulfite detection from *GOT1*<sup>-/-</sup> and *GOT2*<sup>-/-</sup> cells.**

Sulfite was measured from WT, *SUOX*<sup>-/-</sup>, *GOT1*<sup>-/-</sup>, *GOT2*<sup>-/-</sup>, *GOT1*<sup>-/-</sup>/*SUOX*<sup>-/-</sup> and *GOT2*<sup>-/-</sup>/*SUOX*<sup>-/-</sup> cell extracts (n = 3). Values were adjusted to cellular protein concentration and normalized to WT. Error bars indicate standard deviation.

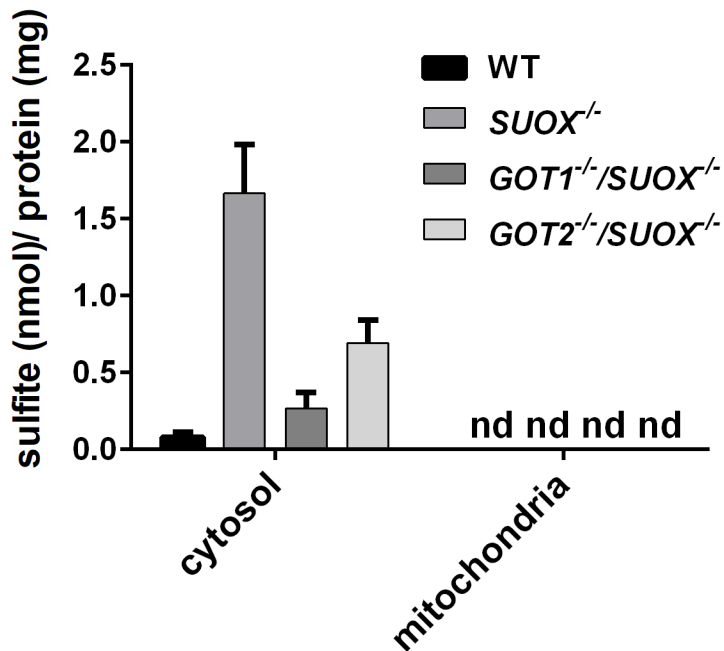

**Fig. S2: Sulfite detection from mitochondrial fractions**

Cytosolic and mitochondrial fractions from WT, *SUOX*<sup>-/-</sup>, *GOT1*<sup>-/-</sup>/*SUOX*<sup>-/-</sup> and *GOT2*<sup>-/-</sup>/*SUOX*<sup>-/-</sup> cells were separated by differential centrifugation. Mitochondrial fractions were solubilized in sulfite assay buffer and tested for sulfite content (n = 3). Values were adjusted to cellular protein concentration and normalized to WT. Error bars indicate standard deviation.

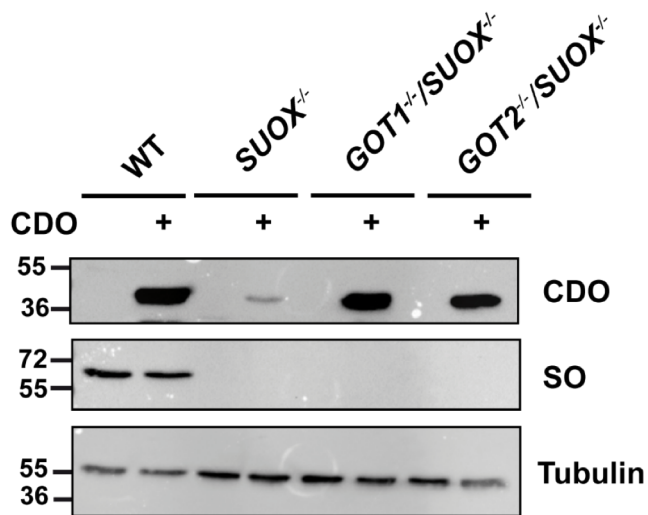

**Fig. S3: CDO expression levels.**

After transient transfection of WT, *SUOX*<sup>-/-</sup>, *GOT1*<sup>-/-</sup>/*SUOX*<sup>-/-</sup> and *GOT2*<sup>-/-</sup>/*SUOX*<sup>-/-</sup> cells with CDO, CDO expression levels were analyzed by WB in the respective cells lines (n = 3).

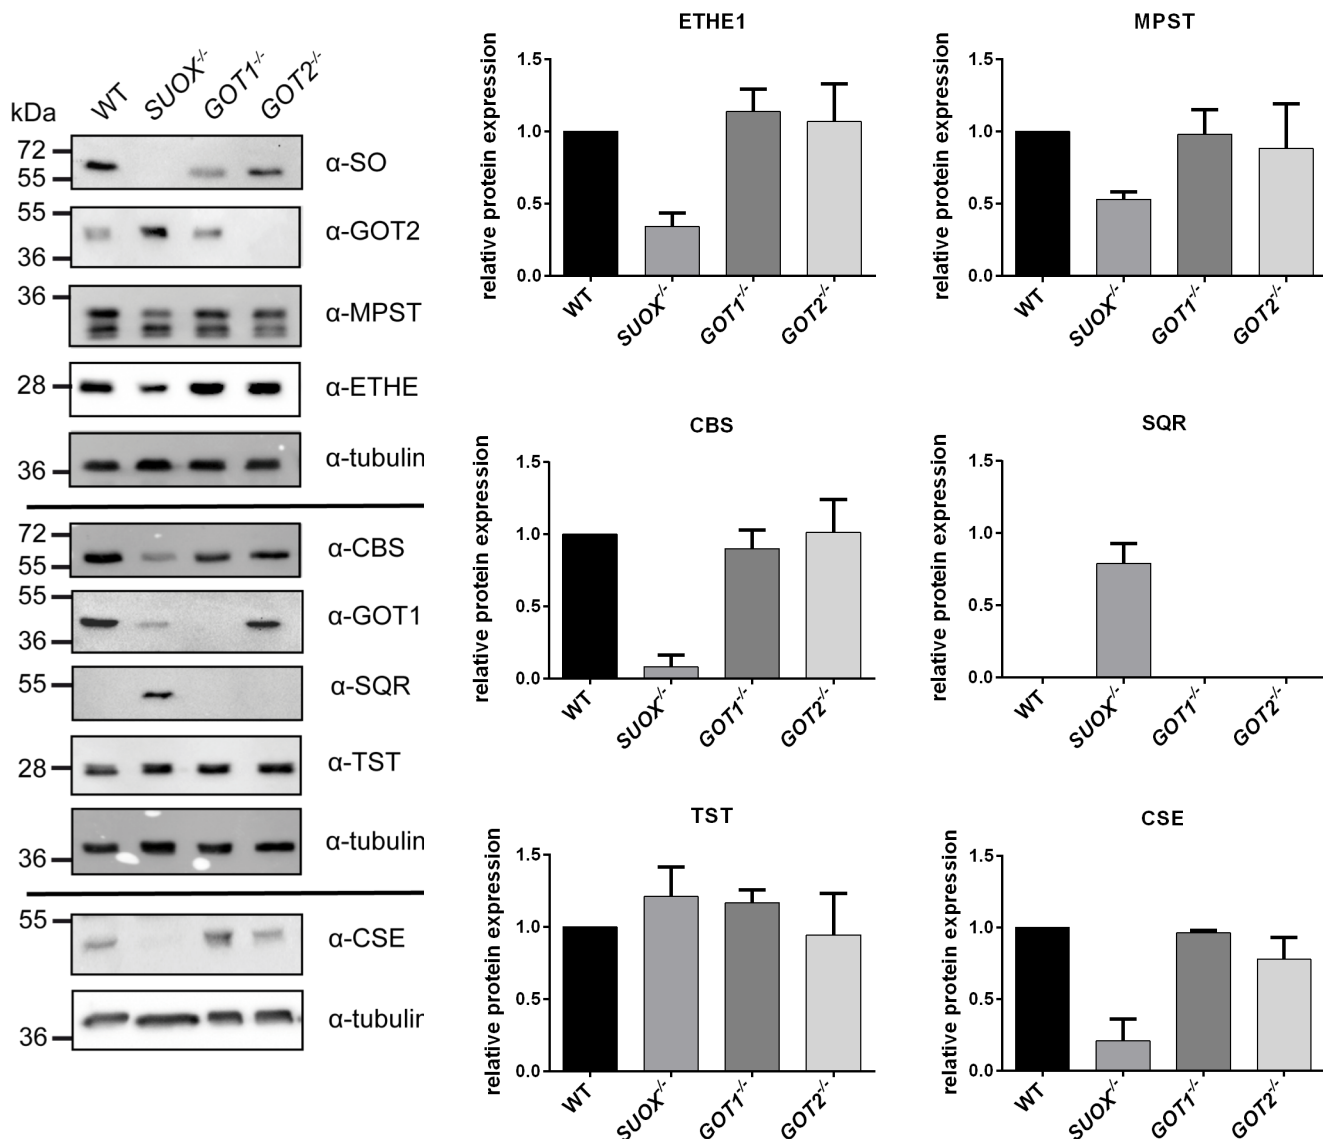

**Fig. S4: Protein expression in *GOT1*<sup>-/-</sup> and *GOT2*<sup>-/-</sup> cells.** Expression levels of proteins involved in cysteine catabolism (SO, SQR, CBS, CSE, TST, GOT1, MPST, GOT2 and ETHE1) in WT, *SUOX*<sup>-/-</sup>, *GOT1*<sup>-/-</sup>, *GOT2*<sup>-/-</sup>, *GOT1*<sup>-/-</sup>/*SUOX*<sup>-/-</sup> and *GOT2*<sup>-/-</sup>/*SUOX*<sup>-/-</sup> cells. Tubulin was used as a loading control. Quantification of expression changes is visualized in relation to tubulin and WT samples (n = 2).
